# Supplementary material for: Polymer/zinc hybrid-flow battery using block copolymer micelles featuring a TEMPO corona as catholyte
Source: Royal Society of Chemistry journal article supplement (doi:10.1039/c5py02036k), 2016-01-01
Supplement: c5py02036k1.pdf [file c5py02036k1.pdf]

Electronic Supplementary Material (ESI) for Polymer Chemistry. This journal is © of The Royal Society of Chemistry 2014

## Supporting information

### Polymer/Zinc Hybrid-Flow Battery Using Block Copolymer Micelles featuring a TEMPO Corona As Catholyte

Jan Winsberg,<sup>ab</sup> Simon Muench,<sup>ab</sup> Tino Hagemann,<sup>ab</sup> Sabine Morgenstern,<sup>ab</sup> Tobias Janoschka,<sup>ab</sup> Mark Billing,<sup>a</sup> Felix H. Schacher,<sup>ab</sup> Guillaume Hauffman,<sup>c</sup> Jean-François Gohy,<sup>c</sup> Stephanie Hoepfner,<sup>a</sup> Martin D. Hager,<sup>ab</sup> Ulrich S. Schubert<sup>ab \*</sup>

a Laboratory of Organic and Macromolecular Chemistry (IOMC), Friedrich Schiller University Jena, Humboldtstraße 10, 07743 Jena, Germany ulrich.schubert@uni-jena.de

b Center for Energy and Environmental Chemistry Jena (CEEC Jena), Friedrich Schiller University Jena, Philosophenweg 7a, 07743 Jena, Germany

c Institute of Condensed Matter and Nanoscience, Bio- and Soft Matter, Université catholique de Louvain, Louvain-la-Neuve, 1348 Belgium.

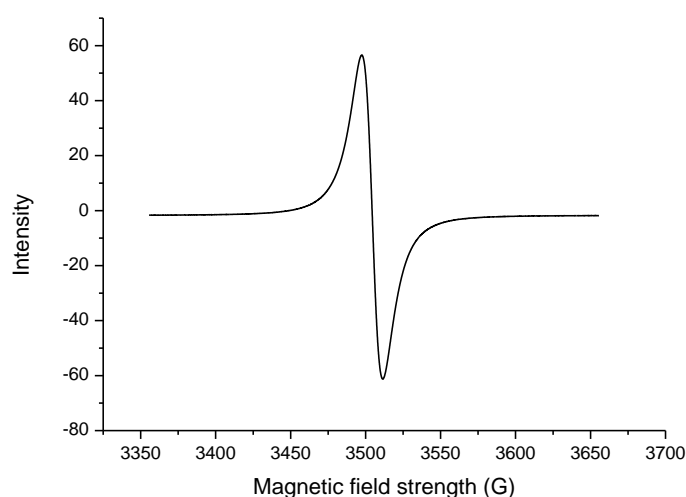

Figure S1: Electron paramagnetic resonance (EPR) measurement of PTMA<sub>63</sub>-*b*-PS<sub>35</sub> in the solid state, spin count: 1.657×10<sup>18</sup> spins mg<sup>-1</sup>.

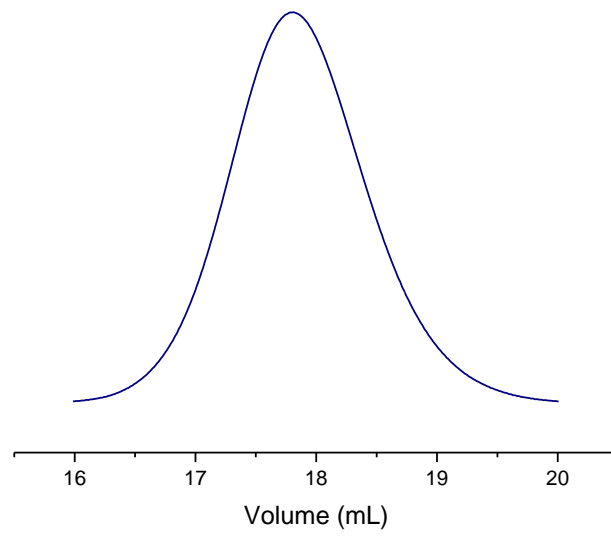

Figure S2: Size exclusion chromatography (SEC) elugram of PTMA<sub>63</sub>-*b*-PS<sub>35</sub>, eluent: DMAc + 0.21 wt-% LiCl, poly(styrene) standard.

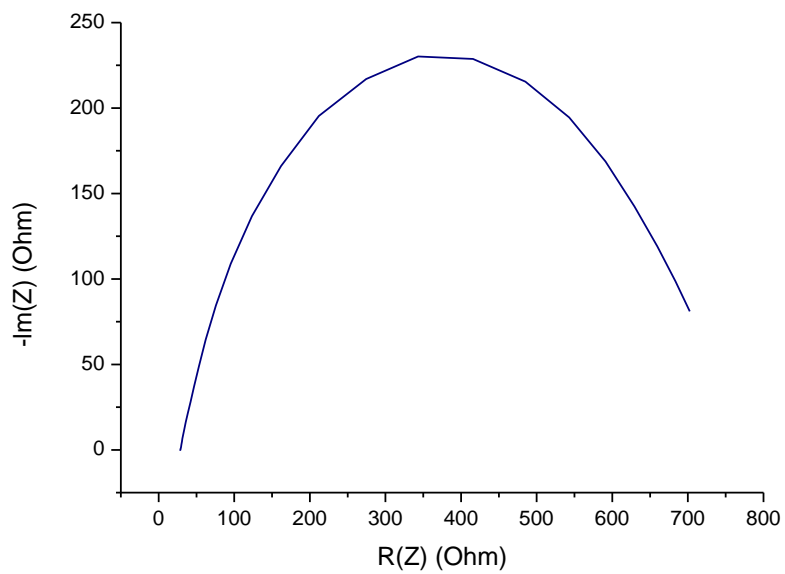

Figure S3: Electrochemical impedance spectroscopy (EIS) of a polymer TEMPO/zinc hybrid-flow battery (pHFB) between 100 mHz and 200 kHz at 0 V in potentiostatic mode.

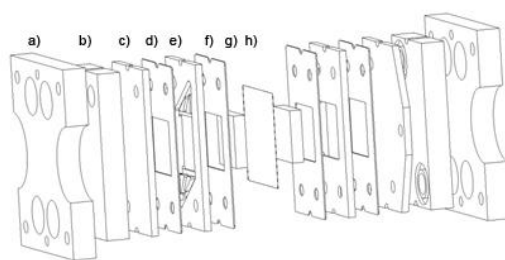

Scheme S1: Schematic representation of the electrochemical cell. One half-cell consists of a frame (a), PTFE block with hose connections and rubber seal (b), graphite or zinc current collector (c), rubber sealing (d), PTFE flow frame (e), rubber sealing (f) and a surface enhancing graphite felt/carbon paper (g). Both half cells are separated by a size exclusion membrane (h).

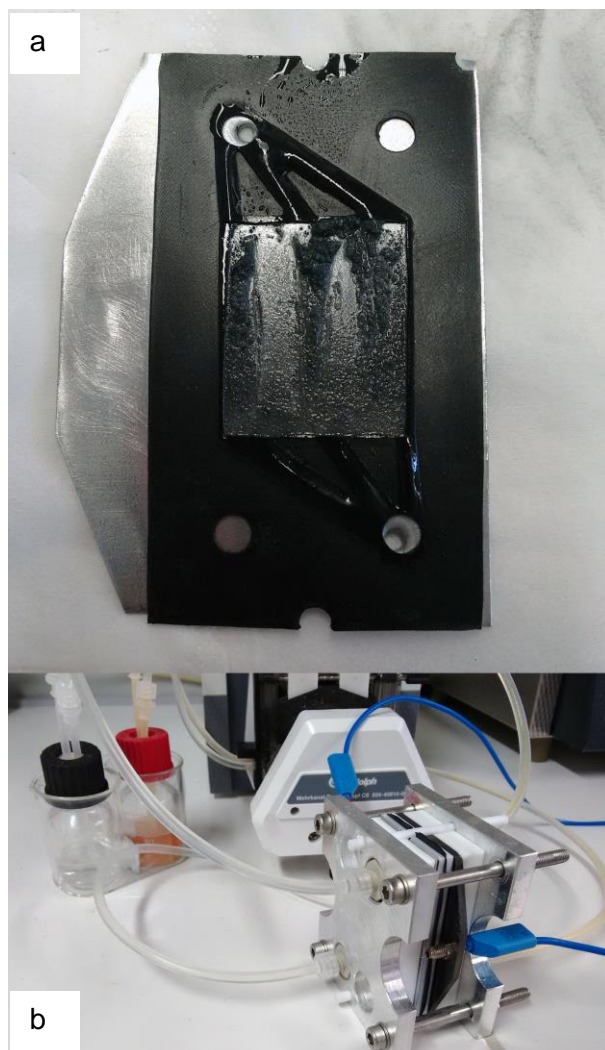

Figure S4: a) Dendrite formation inside the anode half-cell after battery cycling and b) pumped pHFB setup, comprising the electrochemical cell, two reservoir tanks (catholyte & anolyte) and a peristaltic pump.

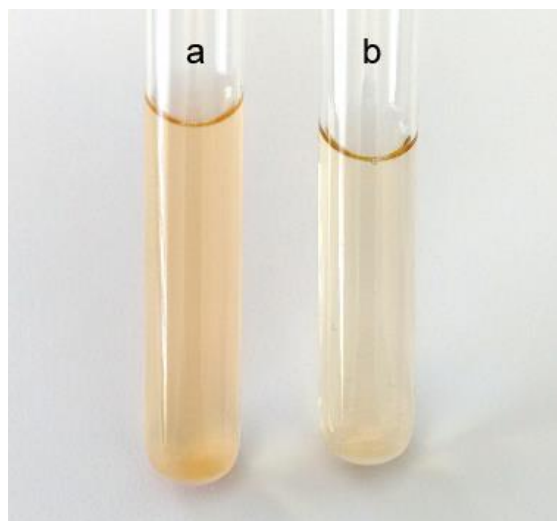

Figure S5: Micellar catholyte a) prior to charging (cloudy dispersion) and b) after charging (clear solution).

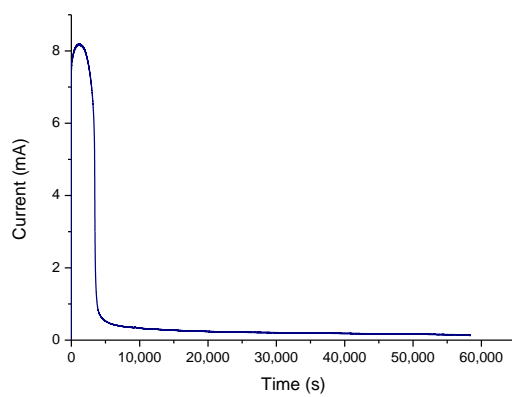

Figure S6: Chronoamperometry for charging of the pHFB, potential 1.9 V. The resulting current was measured over time.

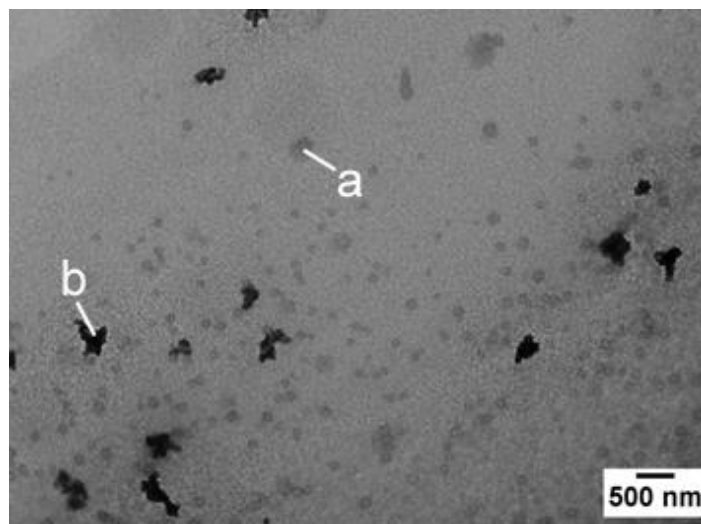

Figure S7: Transmission electron microscopy (TEM) image of PTMA<sub>63</sub>-*b*-PS<sub>35</sub> after charging, catholyte: 13 mg mL<sup>-1</sup> active polymer in EC/DMC/DEC (*v:v:v* 1:1:1) with 0.5 M Zn(ClO<sub>4</sub>)<sub>2</sub>·6H<sub>2</sub>O; secondary agglomerate ~300 nm diameter (a), high contrast agglomerate with an elevated content of heavy metal supporting electrolyte (b).

Table S1: Ion conductivity of the applied electrolyte.

| Electrolyte                                                 | Ion conductivity [mS cm <sup>-1</sup> ] |
|-------------------------------------------------------------|-----------------------------------------|
| 0.5 M Zn(ClO <sub>4</sub> ) <sub>2</sub> ·6H <sub>2</sub> O | 5.9                                     |
